# Supplementary material for: Methionine and its hydroxy analogues: the paths toward their sustainable chemical synthesis
Source: Royal Society of Chemistry journal article supplement (doi:10.1039/d3gc03826b), 2024-01-01
Supplement: d3gc03826b1.pdf [file d3gc03826b1.pdf]

## Methionine and its hydroxy analogues: the paths toward their sustainable chemical synthesis †

Sergio Calderon-Ardila,<sup>a</sup> Didier Morvan,<sup>b</sup> Olivier Péruch,<sup>b</sup> Virginie Bellière-Baca,<sup>b</sup> Michiel Dusselier<sup>\*a</sup> and Bert F. Sels<sup>\*a</sup>

### SUPPORTING INFORMATION

**Table S1:** Detailed quantitative sustainability metrics for the synthesis of D,L-Met and HMTBA produced by industrial (1-3) and renewable (4-6) synthetic routes.

| Metric                                              | Yield (%) | AE (%)      | RME (%)     | OE (%)      | PMI (g ·g <sup>-1</sup> ) | PMI RRC (g ·g <sup>-1</sup> ) | PMI Solv (g ·g <sup>-1</sup> ) | PMI WU (g ·g <sup>-1</sup> ) | RI (g ·g <sup>-1</sup> ) | RP (%)      |             |
|-----------------------------------------------------|-----------|-------------|-------------|-------------|---------------------------|-------------------------------|--------------------------------|------------------------------|--------------------------|-------------|-------------|
| Process                                             | Step      |             |             |             |                           |                               |                                |                              |                          |             |             |
| <b>(1) Propene to D,L-Met (through hydantoin)</b>   |           | <b>81.0</b> | <b>40.7</b> | <b>17.9</b> | <b>43.9</b>               | <b>31.0</b>                   | <b>6.7</b>                     | <b>20.7</b>                  | <b>3.6</b>               | <b>28.3</b> | <b>91.1</b> |
|                                                     | 1         | 90.0        | 75.7        | 60.0        | 79.2                      | 9.9                           | 1.8                            | 3.2                          | 5.0                      |             |             |
|                                                     | 2         | 91.1        | 100         | 90.9        | 90.9                      | 3.7                           | 2.6                            | 1.1                          | 0                        |             |             |
|                                                     | 3         | 99.8        | 90.6        | 58.5        | 64.6                      | 5.5                           | 1.7                            | 3.8                          | 0                        |             |             |
|                                                     | 4         | 99.1        | 60.0        | 30.9        | 51.6                      | 15.7                          | 3.2                            | 11.2                         | 1.2                      |             |             |
|                                                     | 5         | 100         | 72.7        | 62.4        | 85.8                      | 1.6                           | 1.6                            | 0                            | 0                        |             |             |
| <b>(2) Propene to D,L-Met (through cyanohydrin)</b> |           | <b>67.7</b> | <b>60.8</b> | <b>16.6</b> | <b>27.3</b>               | <b>31.4</b>                   | <b>7.2</b>                     | <b>19.9</b>                  | <b>4.3</b>               | <b>28.8</b> | <b>91.8</b> |
|                                                     | 1         | 90.0        | 75.7        | 60.0        | 79.2                      | 9.9                           | 1.8                            | 3.2                          | 5.0                      |             |             |
|                                                     | 2         | 97.9        | 100         | 92.1        | 92.1                      | 3.6                           | 2.6                            | 1.0                          | 0                        |             |             |
|                                                     | 3         | 98.1        | 100         | 79.5        | 79.5                      | 1.8                           | 1.3                            | 0.6                          | 0                        |             |             |
|                                                     | 4         | 77.0        | 65.6        | 18.7        | 28.5                      | 24.1                          | 5.3                            | 17.0                         | 1.8                      |             |             |
| <b>(3) Propene to D,L-HMTBA</b>                     |           | <b>71.8</b> | <b>50.0</b> | <b>37.2</b> | <b>74.4</b>               | <b>11.1</b>                   | <b>3.9</b>                     | <b>3.3</b>                   | <b>3.9</b>               | <b>7.3</b>  | <b>66.0</b> |
|                                                     | 1         | 90.0        | 75.7        | 60.0        | 79.2                      | 9.9                           | 1.8                            | 3.2                          | 5.0                      |             |             |
|                                                     | 2         | 91.1        | 100         | 90.9        | 90.9                      | 3.7                           | 2.6                            | 1.1                          | 0                        |             |             |
|                                                     | 3         | 93.2        | 100         | 90.3        | 90.3                      | 2.1                           | 1.1                            | 1.0                          | 0                        |             |             |
|                                                     | 4         | 94.0        | 53.2        | 45.3        | 85.2                      | 3.7                           | 2.2                            | 0                            | 1.5                      |             |             |
| <b>(4) DHA to D,L-HMTBA (through 2-HBL)</b>         |           | <b>68.0</b> | <b>66.3</b> | <b>38.3</b> | <b>57.7</b>               | <b>144.8</b>                  | <b>3.5</b>                     | <b>122.1</b>                 | <b>19.1</b>              | <b>45.7</b> | <b>92.5</b> |
|                                                     | 1         | 68.0        | 85.0        | 38.5        | 45.3                      | 53.8                          | 3.9                            | 49.8                         | 0                        |             |             |
|                                                     | 2         | 100         | 72.0        | 65.4        | 90.8                      | 108.9                         | 1.5                            | 88.2                         | 19.1                     |             |             |
| <b>(5) Tetrose to D,L-HMTBA (through MVG)</b>       |           | <b>38.1</b> | <b>42.7</b> | <b>19.0</b> | <b>44.4</b>               | <b>68.0</b>                   | <b>6.9</b>                     | <b>59.6</b>                  | <b>1.5</b>               | <b>65.2</b> | <b>95.9</b> |
|                                                     | 1         | 50.0        | 76.3        | 29.0        | 58.4                      | 4.8                           | 53.5                           | 0                            | 0                        |             |             |
|                                                     | 2         | 81.0        | 100         | 78.1        | 78.1                      | 5.0                           | 1.5                            | 3.6                          | 0                        |             |             |
|                                                     | 3         | 94.0        | 47.6        | 40.8        | 85.6                      | 4.0                           | 2.5                            | 0                            | 1.5                      |             |             |
| <b>(6) GA dimer to D,L-HMTBA</b>                    |           | <b>35.2</b> | <b>42.7</b> | <b>12.7</b> | <b>29.6</b>               | <b>650.5</b>                  | <b>14.5</b>                    | <b>634.5</b>                 | <b>1.5</b>               | <b>641</b>  | <b>98.5</b> |
|                                                     | 1         | 37.5        | 82.0        | 17.6        | 21.5                      | 556.7                         | 11.4                           | 545.3                        | 0                        |             |             |
|                                                     | 2         | 94.0        | 47.6        | 40.8        | 85.6                      | 4.0                           | 2.5                            | 0                            | 1.5                      |             |             |

AE: Atom economy. RME: Reaction mass efficiency. OE: Optimum efficiency. PMI: process mass intensity. PMI RRC: PMI for reactants, reagents and catalysts. PMI Solv: PMI of solvents. PMI WU: PMI of species used in reaction work-ups. RI: Renewables intensity. RP: Renewables percentage.
